# Supplementary material for: Evolutionary Changes in DnaA-Dependent Chromosomal Replication in Cyanobacteria
Source: PubMed Central journal article supplement (PMC7198777; doi:10.3389/fmicb.2020.00786), 2020-04-28
Supplement: Table_1.pdf [file Table_1.pdf]

| Table S1 |                   |                                          |
|----------|-------------------|------------------------------------------|
| Number   | Primer name       | Sequence 5' --> 3'                       |
| 1        | 7942dnaA-F        | GACTATGCAGGATCCGTGGAACAGTCCCTAGAAC       |
| 2        | 7942dnaA-R        | TGCCTGCAGGTCGACCTAACCGCGCTAGCTAC         |
| 3        | HA-F              | GTCGACCTGCAGGCATGC                       |
| 4        | HA-R              | GGATCCTGCATAGTCCGGGAC                    |
| 5        | 7942dnaAus300F    | GTTACCACCGCTGCGGCTGCTTCGCTGCGATTT        |
| 6        | 7942dnaAus-R      | GAGCTCGAATTCATAGCGATCGCAGCTGAATAG        |
| 7        | Ptrd-ds-F         | ATGGAATTCGAGCTCCACCGC                    |
| 8        | Ptrc-up-R         | CGCAGCGGTGTAACGGC                        |
| 9        | 7002dnaA-F        | GACTATGCAGGATCCGTGACTCAAATCCCCAATG       |
| 10       | 7002dnaA-R        | TGCCTGCAGGTCGACCTAGAGGTTTTGGTGATGG       |
| 11       | 6803dnaA-F        | GACTATGCAGGATCCATGGTCTCCTGCGAAAATC       |
| 12       | 6803dnaA-R        | TGCCTGCAGGTCGACCTAGGATTCGGGGCTTG         |
| 13       | 7002ssbUS-F       | CCACGGAAAAATCTGCCAAAGTTGG                |
| 14       | 7002ssb-R         | TACTGTGACCCCGTAGTTGTTATAATTATCTACCGC     |
| 15       | GFP-F             | CAACTACGGGTCGACAGTAAAGGAGAAGAACTTTTCAC   |
| 16       | Gm-R              | CGGAGGGTGTTAGGTGGCGGTACTTGGGTCG          |
| 17       | 7002ssbDS-F       | CGCCACCTAAACACCCCTCCGCTGCGGC             |
| 18       | 7002ssbDS-R       | CAGCCGGATTTGAATTTACTGGCAG                |
| 19       | 7002rpoC2-F       | CCGGATCGAAGAACTCCTCGAAG                  |
| 20       | 7002rpoC-R        | TACTGTGACTTGGTCTTTCATCCAATTATCATCAATC    |
| 21       | GFP-F             | GAAAGACCAAGTCGACAGTAAAGGAGAAGAACTTTTCAC  |
| 22       | Spec-R            | TAGATTGCCATTATTTGCCGACTACCTTGGTGATC      |
| 23       | 7002rpoC2DS-F     | CGGCAAATAATGGCAATCTAATCGCCAAAAATCATC     |
| 24       | 7002rpoC2DS-R     | CGATGTCGCCAAGGAATCCTTG                   |
| 25       | 7002dnaAus-F      | CGTAAGGACGCTCGCGCC                       |
| 26       | 7002dnaAus-R      | CAATTCACACGTGATTGATCCTACGAAATAGACGGG     |
| 27       | Km-F              | GATCAATCACGTGTGGAATTGTGAGCGGATAACAATTTTC |
| 28       | km-R              | CCGCTTGTCTTAGAAAACTCATCGAGCATCAAATGAAAC  |
| 29       | 7002dnaAds-F      | GTTTTTCTAAGGACAAGCGGCCACATC              |
| 30       | 7002dnaAds-R      | GGAATGTTTGCCCGTTTGCC                     |
| 31       | 7002dnaAus-F      | CTCTTGAAC TGCGAAAGAACTG                  |
| 32       | 7002dnaAus-R      | CGAATTCATCGTGATTGATCCTACGAAATAGACGGG     |
| 33       | HA-F              | ATCAATCACGATGGAATTCGAGCTCCACCGC          |
| 34       | 7002dnaA-R        | CACCGCTGCGCTAGAGGTTTTGGTGATGGTGATTAATGC  |
| 35       | Spec-F            | AAACCTCTAGCGCAGCGGTGTAACGGC              |
| 36       | Spec-R            | CCGCTTGTCTTATTTGCCGACTACCTTGGTGATCTC     |
| 37       | 7002dnaAds-F      | CGGCAAATAAGGACAAGCGGCCACATCGTAC          |
| 38       | 7002dnaAds-R      | GGCCCTGGTCGGTTGAAATAAGC                  |
| 39       | HA-F for confirm  | CCCATACGATGTTCTGACTATGC                  |
| 40       | 6803dnaA-us-F     | GGGCAAAGTGACAGGATTGGC                    |
| 41       | 6803dnaA-us-R     | CTCGAATTCATCAAAAATATACAAAATACTTAGTAGG    |
| 42       | HA-F for 6803dnaA | GTATATTTTTGATGGAATTCGAGCTCCACCG          |
| 43       | 6803dnaA-R        | CACCGCTGCGCTAGGATTCGGGGCTTGGC            |
| 44       | spec-F            | CCGGAATCCTAGCGCAGCGGTGTAACGGC            |
| 45       | spec-R            | GATCGCCAGGGTTTATTTGCCGACTACCTTGGTGATCTC  |
| 46       | 6803dnaA-ds-F     | TCGGCAAATAAACCCCTGGCGATCGGC              |
| 47       | 6803dnaA-ds-R     | ACCGAAGCACCGTGGAG                        |
| 48       | a                 | CGTCATTGATCAATCTCCATCGGC                 |
| 49       | b                 | CCTTGCATACCTCACACTGCAC                   |
| 50       | c                 | GATAACCCAGACTATAGCGACCGG                 |
| 51       | d                 | GAATTTGAATCGTTTCTTTCATGCAGCC             |
| 52       | dnaN-target-f     | GGGGTCGATCGCTGAAAGTCTTGC                 |
| 53       | dnaN-target-r     | GGGGAGGCTGCCGAGCCTTTG                    |
| 54       | 1294-target-f     | CAGACGATCGCTATTTAGTCCAG                  |
| 55       | 1294-target-r     | GGCGGAATTCTGAAACTCTTATC                  |
